# Supplementary material for: The cyclophilin DIAGEOTROPICA has a conserved role in auxin signaling
Source: Oxford University Press journal article supplement (doi:10.1242/dev.074831), 2012-02-09
Supplement: dev074831tables1.pdf [file dev074831tables1.pdf]

**Table S1. Primers used in this study**

| Name                         | Sequence                               |
|------------------------------|----------------------------------------|
| PpDGT-F                      | TTTTGTGTGTGTTTCGCTGGA                  |
| PpDGT-R                      | AGGCAATACCGAAAGTCAACAC                 |
| PML9                         | AACTCGAGGGATCCATGTTACGTCTGTAGAAACCC    |
| PML10                        | AACTCGAGCCGATCTAGTAACATAGATGACACCGC    |
| PML132                       | CACCGGATCCCTCGAGGTCCACTGCTGAAAAAGCCCC  |
| PML125                       | CTCGAGGGATCCCTTTGATCTGCACATACACAGCCG   |
| PML128                       | CACCACTAGTGGTGTGACTTTTCGGTATTGCC       |
| PML129                       | ACTAGTGGATGATTCTCGATTGTGCAACAC         |
| PML149                       | GTTTCATGTGCCAGGGTGTGACTTCACCAGGGG      |
| PML150                       | CCCCTGGTGAAGTCATCACCCCTGGCACATGAAC     |
| PML230                       | CACCATGAAGTTTAGCAACGAAGTTGTC           |
| PML203                       | CACCGAATTCATGCCCCCTCGGTCTTTCC          |
| PML204                       | GAATTCCAAGGTTTCTACGAAGTGCCG            |
| PML208                       | GTCGACTTATCGATTTTCAACCCGGGG            |
| PML289                       | CACCGGATCCCGGACTCCGATCTCCAAATTGAGG     |
| PML301A                      | GGATCCCTCGAGCAACTGTCCGCAGTCAGCTATC     |
| PML371                       | CACCGGTACCAACATGGTGGAGCACGAC           |
| PML372                       | GGTACCCCTGGATTTTGGTTTTAGGAAATTAGAAATTT |
| PML378                       | CACCCCTCGAGGTGAGCAAGGGCGAGGAGCTG       |
| PML379                       | CTCGAGGTTACCCGGCCGCCGTGCTG             |
| PML380                       | GTCCGGACTCAGATCACGAGCTCAAGCTTC         |
| PML381                       | GAAGCTTGAGCTCGTGATCTGAGTCCGGAC         |
| PpIAA1A-F                    | ATCCGGGAGTCCGAGCTTC                    |
| PpIAA1A-R                    | GGTTCTGCGCAGGAGGTG                     |
| PpIAA1B-F                    | CGGTGGTCAGAATGGGTCA                    |
| PpIAA1B-R                    | CCCACAGTCTGGTTCTGCG                    |
| PpIAA2-F                     | TGCCCTGGGACTGGTTTCATC                  |
| PpIAA2-R                     | CACAGCACCTTGGGCTTTCA                   |
| PpACT-F                      | CAGCCTTTGGTGTGCGACAA                   |
| PpACT-R                      | ACATACCGCTCCTTCTGTCC                   |
| PML409;ARF19B                | TTGCAGCAATTCTGAGGATGCC                 |
| PML419;ARF19A                | AAGGACAACGTGGAGGTGTTGG                 |
| PML466;Alcohol dehydrogenase | GGCTACGGCTATGATCAACAAACG               |
| PML467;Alcohol dehydrogenase | TGTGCTGTGTTCCGGATTCCAAG                |
| PML472;ABI3                  | GGTAATACCACGGACATGTTGACC               |
| PML473;ABI3                  | AGTGAACCTCCGCCCTCTTTCTTAG              |
| PML476;Rehydrin              | CGCCGTGTTGAACCTGGATATG                 |
| PML482;Rehydrin              | CCGTGATGGCCAAGATCAGTAAG                |
| PML484;Dehydrin              | TCTGGCTGCGATTCCACCAATC                 |
| PML485;Dehydrin              | CCAAACATGCCACAAGTTCTGTCC               |
| PML490;PE-binding protein    | ATGGAAGACCTCGGTTCTGTCC                 |
| PML491;PE-binding protein    | TGAAACCCTCTGGCAACCCTTTC                |
| PML492;PKC                   | AGCTGTTGGGCGGAGATATTATGG               |
| PML493;PKC                   | CACTGGCTTCTTATCAGCACTGG                |
| PML495;Ascorbate peroxidase  | TGAGAAGTACGCTGCGCTCATTG                |
| PML496;Ascorbate peroxidase  | GTGCGCAGTTCTTCTCTGCTAC                 |
| PML497;HSP70                 | TGCTTCATCGGCGATTGGGTAG                 |
| PML498;HSP70                 | TTGGATCTGCCACGGCTTTGAG                 |
| PML499;HS TF1                | TGATGGAAC TGGTGGCATTACGG               |
| PML500;HS TF1                | CGTTGACCCATTGCCTGCAAATC                |
| PML501;HSP101                | TTGTGAGAGGAGATGTGCCAAGC                |
| PML502;HSP101                | ACCAAGGCTCCCATATCCAAGG                 |
| PML517;ARF19A                | CACGCCCTGGTTTCCAAATCAAC                |
| PML517;ARF19A                | TAGAAGCACGTTCTTGCCTTGC                 |
| PML614;RHD6                  | TCAAACGGCCGAAACATTCTACG                |
| PML615;RHD6                  | CAGCTCCGCTCCTTTTCCAGAAATATG            |
| PML618;GCN5                  | TCCCTCGTTTTCATATGCTGGTTGC              |
| PML619;GCN5                  | TCCTTCACGCTGCCTCTAATGAC                |
| PML624;SAUR                  | AACGTTGCCGTCGTAACCAGTC                 |
| PML625;SAUR                  | ACCACGGTCTTGTGTTGGGCTTC                |
| PML626;AUX1                  | TGGAGGTCACGGAATCACCATC                 |
| PML627;AUX1                  | ACACTGTCAGTCTATGCACAC                  |
